# Supplementary material for: Krüppel-homolog 1 exerts anti-metamorphic and vitellogenic functions in insects via phosphorylation-mediated recruitment of specific cofactors
Source: PubMed Central journal article supplement (PMC8499471; doi:10.1186/s12915-021-01157-3), 2021-10-08
Supplement: 12915_2021_1157_MOESM3_ESM.pdf [file 12915_2021_1157_MOESM3_ESM.pdf]

# Figure 1

**A**

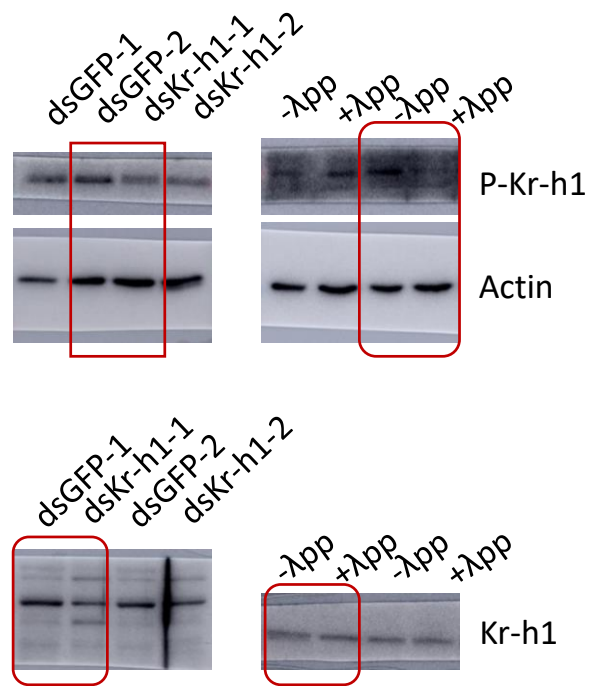

**B**

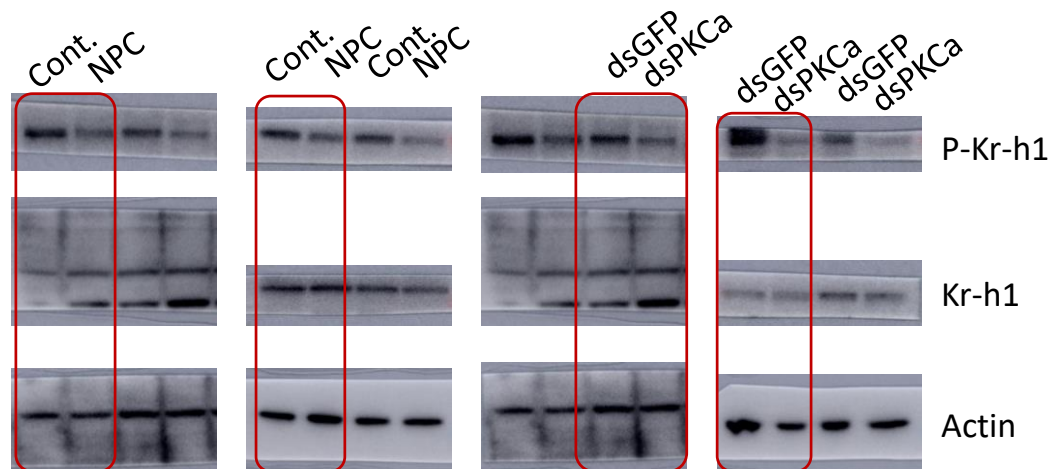

**E**

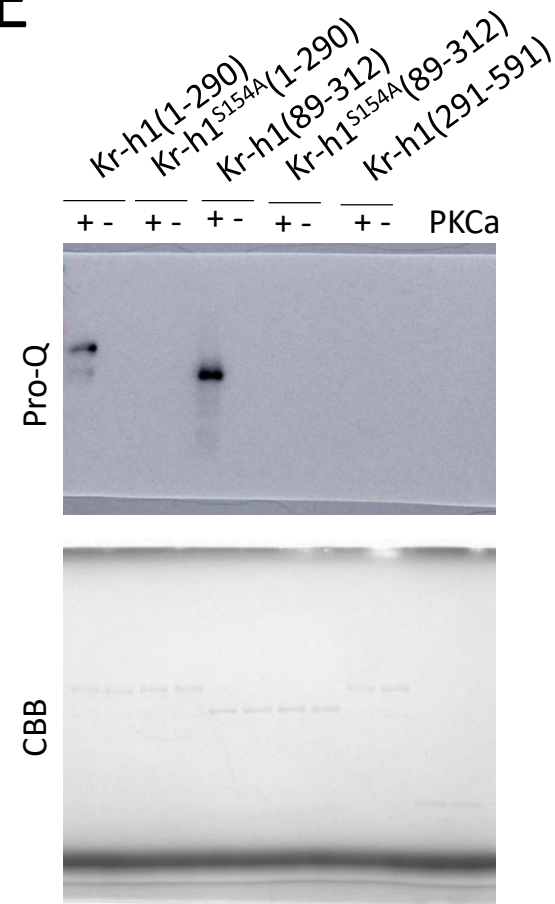

# Figure 2

## A

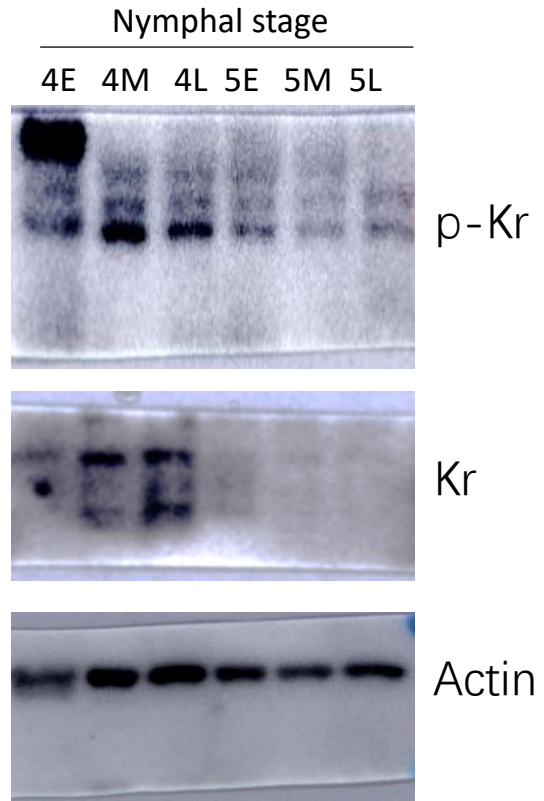

## B

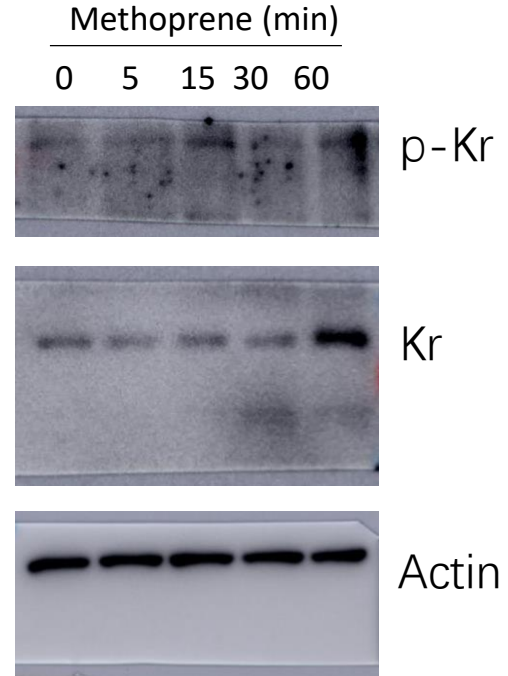

## C

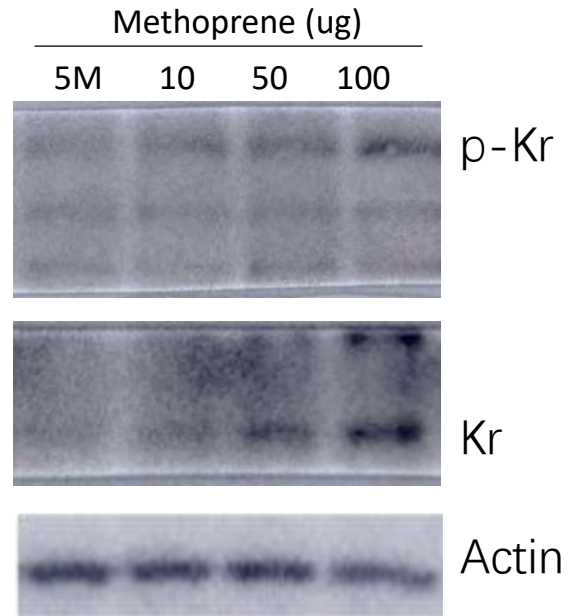

# Figure 2

D

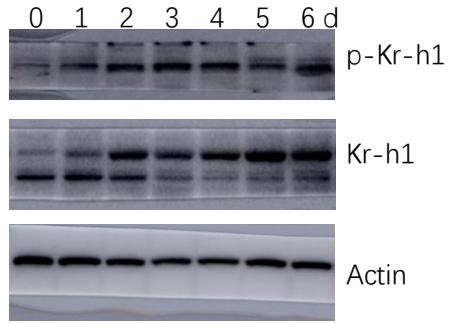

E

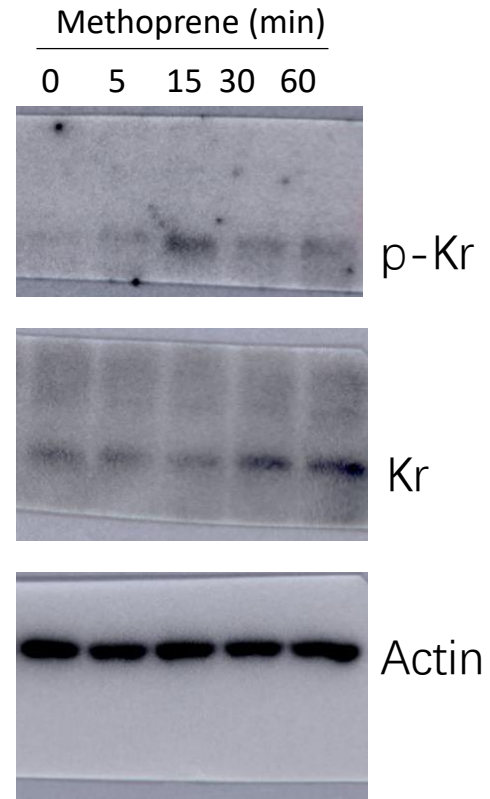

F

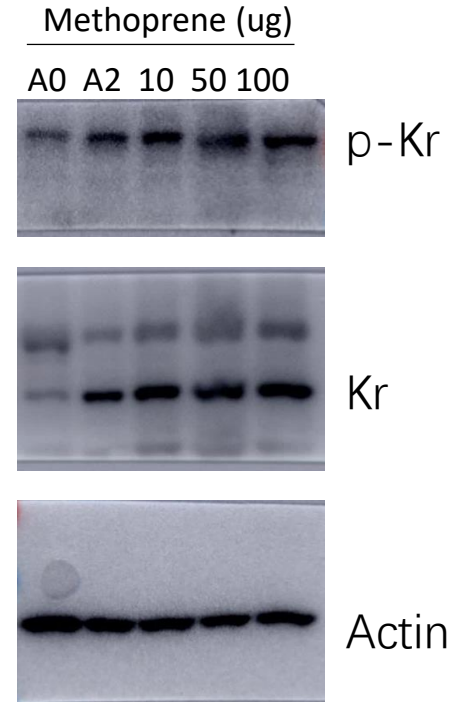

# Figure 5

A

|                             |   |   |   |   |   |   |
|-----------------------------|---|---|---|---|---|---|
| Methoprene                  | - | - | - | + | + | + |
| Flag-Kr-h1                  | + | - | + | + | - | - |
| Flag-Kr-h1 <sup>S154A</sup> | - | - | - | - | + | - |
| Flag-Kr-h1 <sup>S154D</sup> | - | - | - | - | - | + |
| Flag-CtBP                   | - | + | + | + | + | + |

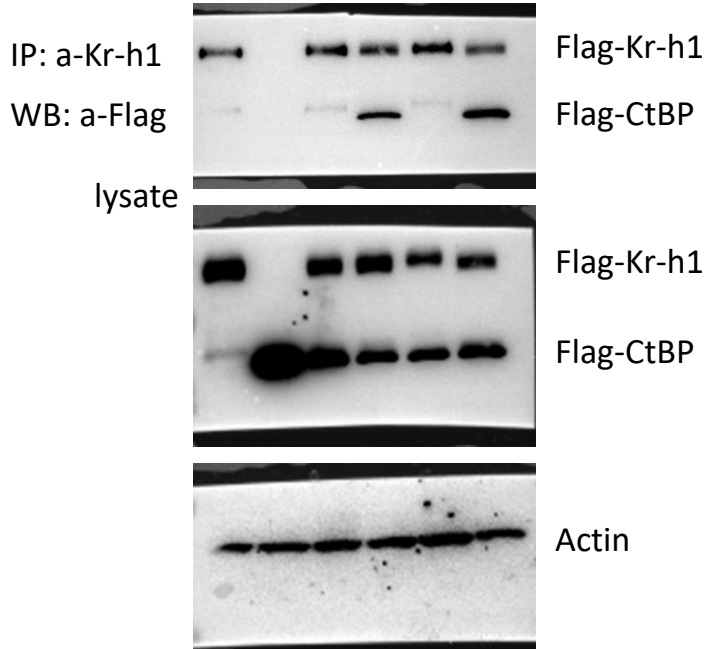

C

|                             |   |   |   |   |   |   |
|-----------------------------|---|---|---|---|---|---|
| Methoprene                  | - | - | - | + | + | + |
| Flag-Kr-h1                  | + | - | + | + | - | - |
| Flag-Kr-h1 <sup>S154A</sup> | - | - | - | - | + | - |
| Flag-Kr-h1 <sup>S154D</sup> | - | - | - | - | - | + |
| Flag-CBP                    | - | + | + | + | + | + |

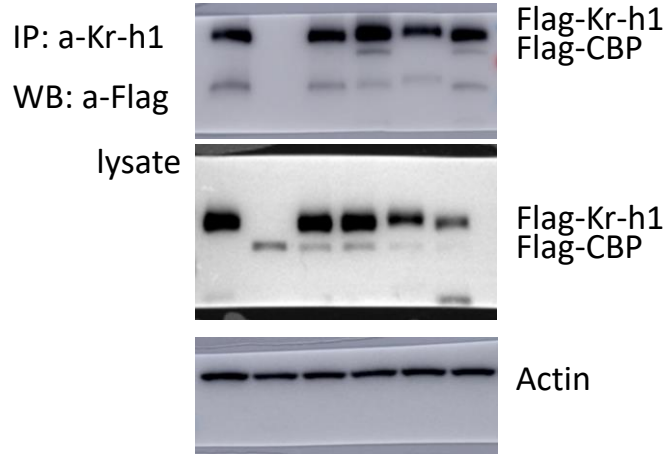

# Figure 6

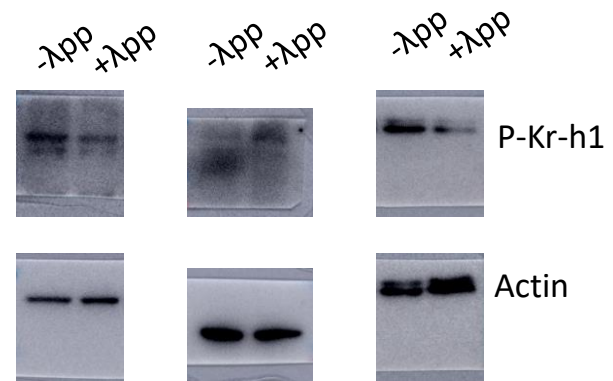

# Figure S1

## B

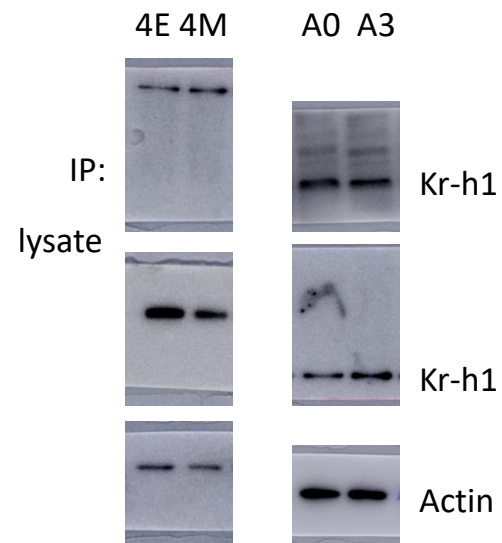

## D

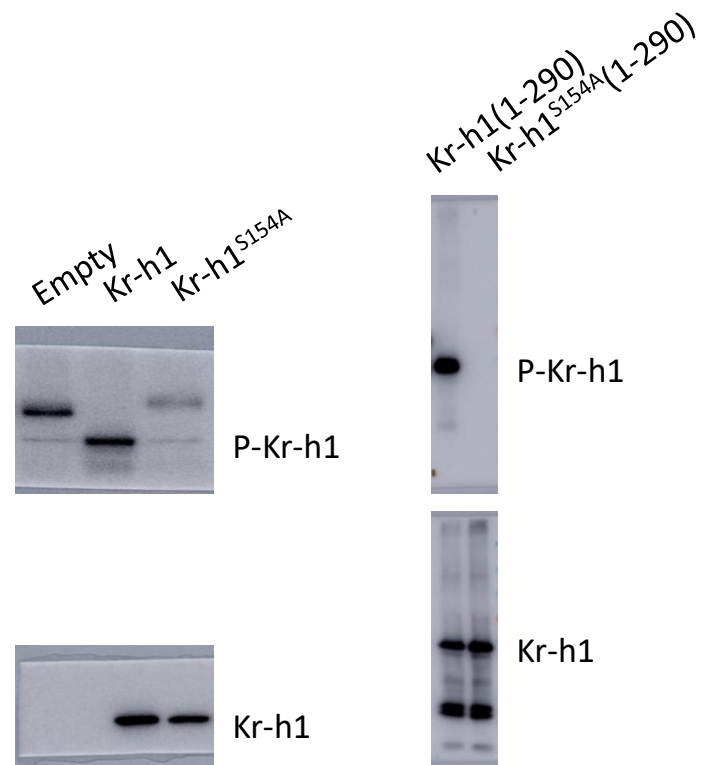

# Figure S2

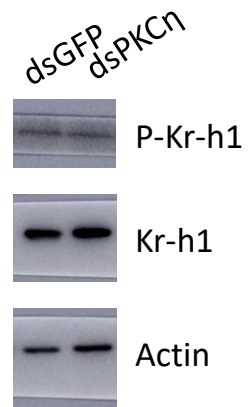

# Figure S5

|                        |   |   |   |   |   |   |
|------------------------|---|---|---|---|---|---|
| Methoprene-            | + | - | + | + | + |   |
| Kr-h1                  | - | - | + | + | - | - |
| Kr-h1 <sup>S154A</sup> | - | - | - | - | + | - |
| Kr-h1 <sup>S154D</sup> | - | - | - | - | - | + |

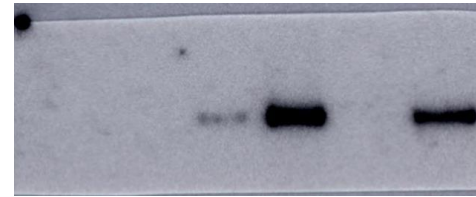

P-Flag-Kr-h1

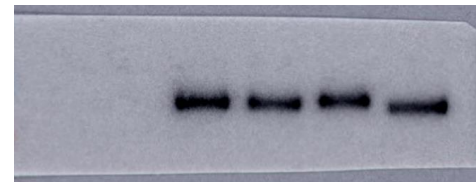

Flag-Kr-h1

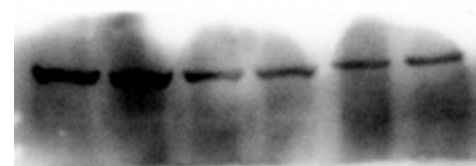

Actin
